# Supplementary material for: Reliability of a low-cost webcam recording system for three-dimensional lower limb gait analysis
Source: Int Biomech. 2019 Sep 26;6(1):85–92. doi: 10.1080/23335432.2019.1671221 (PMC7857306; doi:10.1080/23335432.2019.1671221)
Supplement: Supplemental Material [file TBBE_A_1671221_SM4664.doc]

**Table S1: The joint angles** (mean ± SD) obtained by the 3D-WCRS and standard motion analysis system (sagittal plane); n = 20

| **phases** | **hip jointa** | | | | | | **knee jointb** | | | | | | **ankle jointc** | | | | | | |
| --- | --- | --- | --- | --- | --- | --- | --- | --- | --- | --- | --- | --- | --- | --- | --- | --- | --- | --- | --- |
| **3D-WCRS** | | | | **standard system** | | **3D-WCRS** | | | | **standard system** | | **3D-WCRS** | | | | | **standard system** | |
| **1st session** | | **2nd session** | | **1st session** | | **2nd session** | | **1st session** | | **2nd session** | | |
| **mean** | **SD** | **mean** | **SD** | **mean** | **SD** | **mean** | **SD** | **mean** | **SD** | **mean** | **SD** | **mean** | **SD** | **mean** | **SD** | **mean** | | **SD** |
| **HS** | 27.82o | 1.65o | 28.65o | 1.40o | 28.23o | 1.08o | 5.91o | 1.53o | 6.71o | 2.19o | 2.92o | 1.32o | -3.93o | 1.95o | -3.85o | 1.98o | 1.74o | | 1.04o |
| **FF** | 18.67o | 2.40o | 18.81o | 2.27o | 23.66o | 1.44o | 9.59o | 1.95o | 9.59o | 2.90o | 8.71o | 1.89o | -5.30o | 2.28o | -5.88o | 1.74o | -3.47o | | 1.10o |
| **MS** | -0.90o | 1.46o | -0.49o | 1.40o | -2.60o | 1.50o | 5.54o | 1.32o | 6.11o | 1.52o | 1.09o | 1.70o | 7.99o | 1.08o | 7.04o | 1.10o | 9.49o | | 1.21o |
| **HO** | -11.63o | 0.89o | -11.24o | 1.10o | -15.62o | 0.78o | 12.07o | 2.06o | 13.28o | 2.14o | 5.11o | 1.39o | 10.90o | 1.49o | 10.15o | 1.45o | 11.93o | | 1.68o |
| **TO** | -7.31o | 2.37o | -6.80o | 2.15o | -13.28o | 1.28o | 33.22o | 5.09o | 34.35o | 4.03o | 23.94o | 2.82o | -10.95o | 5.76o | -11.90o | 5.16o | -11.26o | | 3.05o |
| **ISW** | 12.92o | 2.62o | 14.22o | 2.43o | 9.03o | 1.48o | 57.75o | 2.56o | 58.76o | 2.65o | 52.41o | 1.82o | -5.36o | 3.49o | -5.40o | 3.43o | -7.61o | | 2.50o |
| **MSW** | 23.96o | 1.23o | 24.43o | 1.27o | 24.41o | 1.31o | 31.50o | 4.87o | 30.93o | 5.42o | 34.31o | 2.21o | 0.70o | 1.39o | -0.11o | 1.63o | 7.19o | | 1.04o |
| **LSW** | 27.75o | 1.55o | 28.05o | 1.39o | 28.37o | 1.26o | 7.05o | 2.23o | 7.14o | 1.80o | 4.53o | 1.55o | -5.52o | 1.18o | -6.22o | 1.31o | 2.77o | | 1.14o |

3D-WCRS: three dimensional gait analysis of hip, knee and ankle joints, HS: heel strike; FF: foot flat; MS: midstance; HO: heel off; TO: toe off; ISW: initial swing; MSW: mid swing; LSW: late swing

a: positive values (+) and negative values (-) were hip flexion hip extension and extension, respectively

b: positive values (+) and negative values (-) were knee flexion and knee extension, respectively

c: positive values (+) and negative values (-) were ankle dorsiflexion and ankle plantarflexion, respectively

**Table S2: The joint angles** (mean ± SD) obtained by the 3D-WCRS and standard motion analysis system (frontal plane); n = 20

| **phases** | **hip jointa** | | | | | | **knee jointb** | | | | | | **ankle jointc** | | | | | |
| --- | --- | --- | --- | --- | --- | --- | --- | --- | --- | --- | --- | --- | --- | --- | --- | --- | --- | --- |
| **3D-WCRS** | | | | **standard system** | | **3D-WCRS** | | | | **standard system** | | **3D-WCRS** | | | | **standard system** | |
| **1st session** | | **2nd session** | | **1st session** | | **2nd session** | | **1st session** | | **2nd session** | |
| **mean** | **SD** | **mean** | **SD** | **mean** | **SD** | **mean** | **SD** | **mean** | **SD** | **mean** | **SD** | **mean** | **SD** | **mean** | **SD** | **mean** | **SD** |
| **HS** | 3.30o | 1.92o | 3.57o | 1.83o | 0.76o | 1.04o | -1.84o | 0.80o | -2.12o | 1.70o | -2.00o | 0.39o | 1.89o | 7.66o | 2.71o | 7.76o | 0.23o | 0.36o |
| **FF** | 2.77o | 2.14o | 2.91o | 2.24o | 5.50o | 1.13o | 0.08o | 0.92o | -0.22o | 1.86o | -0.11o | 0.72o | -0.24o | 3.82o | -1.50o | 4.42o | 2.96o | 0.51o |
| **MS** | 3.04o | 1.48o | 3.38o | 1.54o | 4.88o | 0.48o | 0.52o | 0.33o | 0.32o | 1.02o | -1.56o | 0.32o | 2.14o | 3.77o | 1.08o | 3.59o | 2.06o | 0.45o |
| **HO** | 2.96o | 1.06o | 3.13o | 1.12o | 2.77o | 0.54o | 0.06o | 1.17o | -0.11o | 2.79o | -1.47o | 0.33o | 0.00o | 2.76o | -0.36o | 2.68o | 0.82o | 0.43o |
| **TO** | -1.76o | 2.45o | -1.63o | 2.44o | -3.87o | 1.22o | 5.29o | 2.21o | 5.59o | 5.59o | 6.32o | 2.00o | -2.83o | 5.02o | -3.27o | 5.22o | 1.19o | 0.69o |
| **ISW** | -1.81o | 2.90o | -1.77o | 2.94o | -5.48o | 0.61o | 7.78o | 1.29o | 7.40o | 2.75o | 20.31o | 1.35o | 10.26o | 4.10o | 9.45o | 4.27o | 5.43o | 0.38o |
| **MSW** | 1.32o | 1.59o | 1.13o | 1.24o | -0.01o | 0.70o | -0.49o | 2.39o | -2.68o | 7.69o | 16.56o | 1.45o | 10.95o | 3.38o | 11.21o | 4.79o | 6.01o | 0.38o |
| **LSW** | 2.87o | 1.46o | 2.71o | 1.44o | 0.71o | 0.73o | -3.17o | 0.98o | -3.21o | 2.58o | -1.78o | 0.60o | 6.07o | 5.30o | 5.59o | 6.14o | 0.63o | 0.50o |

3D-WCRS: three dimensional gait analysis of hip, knee and ankle joints, HS: heel strike; FF: foot flat; MS: midstance; HO: heel off; TO: toe off; ISW: initial swing; MSW: mid swing; LSW: late swing

a: positive values (+) and negative values (-) were hip flexion hip extension and extension, respectively

b: positive values (+) and negative values (-) were knee flexion and knee extension, respectively

c: positive values (+) and negative values (-) were ankle dorsiflexion and ankle plantarflexion, respectively

**Table S3: The joint angles** (mean ± SD) obtained by the 3D-WCRS and standard motion analysis system (horizontal plane); n =20

| **phases** | **hip jointa** | | | | | | **knee jointb** | | | | | | **ankle jointc** | | | | | |
| --- | --- | --- | --- | --- | --- | --- | --- | --- | --- | --- | --- | --- | --- | --- | --- | --- | --- | --- |
| **3D-WCRS** | | | | **standard system** | | **3D-WCRS** | | | | **standard system** | | **3D-WCRS** | | | | **standard system** | |
| **1st session** | | **2nd session** | | **1st session** | | **2nd session** | | **1st session** | | **2nd session** | |
| **mean** | **SD** | **mean** | **SD** | **mean** | **SD** | **mean** | **SD** | **mean** | **SD** | **mean** | **SD** | **mean** | **SD** | **mean** | **SD** | **mean** | **SD** |
| **HS** | -2.93o | 3.81o | -2.86o | 4.47o | -6.49o | 2.46o | 4.19o | 4.08o | 5.16o | 4.20o | -4.67o | 1.65o | 3.74o | 2.43o | 2.86o | 2.32o | -2.70o | 1.59o |
| **FF** | 7.54o | 4.20o | 8.50o | 4.06o | 8.21o | 2.56o | 4.79o | 4.56o | 2.93o | 5.10o | -4.40o | 1.46o | 1.75o | 2.15o | 1.33o | 2.10o | -14.68o | 2.15o |
| **MS** | 3.19o | 2.17o | 3.87o | 2.20o | 8.23o | 1.69o | 3.92o | 2.99o | 1.53o | 3.16o | -6.31o | 1.54o | 0.94o | 2.10o | 0.19o | 1.87o | -10.85o | 1.92o |
| **HO** | -2.07o | 2.09o | -1.88o | 1.70o | 3.44o | 0.96o | 8.03o | 2.38o | 6.47o | 2.51o | -3.86o | 1.23o | -0.91o | 2.30o | -1.81o | 2.42o | -5.27o | 1.95o |
| **TO** | -2.61o | 2.46o | -2.34o | 2.90o | 9.94o | 1.95o | 3.45o | 3.68o | 2.55o | 3.70o | -7.43o | 1.37o | -0.19o | 7.53o | -0.27o | 7.80o | -6.90o | 3.16o |
| **ISW** | -0.57o | 2.49o | -1.13o | 2.00o | 19.30o | 1.53o | 4.10o | 3.87o | 4.64o | 4.35o | -3.79o | 1.71o | -15.92o | 5.25o | -15.40o | 5.22o | -24.57o | 1.49o |
| **MSW** | 6.55o | 2.83o | 7.02o | 3.05o | 21.70o | 2.06o | -13.24o | 4.94o | -15.12o | 5.10o | -10.10o | 1.58o | -11.22o | 3.74o | -11.23o | 4.18o | -26.58o | 1.36o |
| **LSW** | -5.10o | 3.70o | -7.23o | 4.13o | -5.24o | 2.98o | -0.45o | 4.76o | 1.84o | 4.50o | -5.09o | 1.83o | -1.95o | 2.39o | -1.79o | 2.44o | -3.17o | 2.27o |

3D-WCRS: three dimensional gait analysis of hip, knee and ankle joints, HS: heel strike; FF: foot flat; MS: midstance; HO: heel off; TO: toe off; ISW: initial swing; MSW: mid swing; LSW: late swing

a: positive values (+) and negative values (-) were hip flexion hip extension and extension, respectively

b: positive values (+) and negative values (-) were knee flexion and knee extension, respectively

c: positive values (+) and negative values (-) were ankle dorsiflexion and ankle plantarflexion, respectively

**Table S4:** **Means and standard errors of measurement (SEM) obtained by 3D-WCRS and standard motion analysis system of one gait cycle in sagittal plane (n = 20)**

| **phases** | **hip jointa** | | | | | | **knee jointb** | | | | | | **ankle jointc** | | | | | |
| --- | --- | --- | --- | --- | --- | --- | --- | --- | --- | --- | --- | --- | --- | --- | --- | --- | --- | --- |
| **3D-WCRS** | | | | **standard system** | | **3D-WCRS** | | | | **standard system** | | **3D-WCRS** | | | | **standard system** | |
| **1st session** | | **2nd session** | | **1st session** | | **2nd session** | | **1st session** | | **2nd session** | |
| **mean** | **SEM** | **mean** | **SEM** | **mean** | **SEM** | **mean** | **SEM** | **mean** | **SEM** | **mean** | **SEM** | **mean** | **SEM** | **mean** | **SEM** | **mean** | **SEM** |
| **HS** | 27.82o | 0.29 o | 28.65 o | 0.20 o | 28.23 o | 0.11 o | 5.91 o | 0.22 o | 6.71 o | 0.76 o | 2.92 o | 0.19 o | -3.93 o | 0.20 o | -3.85 o | 0.52 o | 1.74 o | 0.18 o |
| **FF** | 18.67 o | 0.48 o | 18.81 o | 0.45 o | 23.66 o | 0.14 o | 9.59 o | 0.28 o | 9.59 o | 0.82 o | 8.71 o | 0.38 o | -5.30 o | 0.39 o | -5.88 o | 0.39 o | -3.47 o | 0.19 o |
| **MS** | -0.90 o | 0.25 o | -0.49 o | 0.24 o | -2.60 o | 0.34 o | 5.54 o | 0.19 o | 6.11 o | 0.21 o | 1.09 o | 0.42 o | 7.99 o | 0.11 o | 7.04 o | 0.22 o | 9.49 o | 0.27 o |
| **HO** | -11.63 o | 0.09 o | -11.24 o | 0.16 o | -15.62 o | 0.08 o | 12.07 o | 0.46 o | 13.28 o | 0.43 o | 5.11 o | 0.14 o | 10.90 o | 0.15 o | 10.15 o | 0.36 o | 11.93 o | 0.29 o |
| **TO** | -7.31 o | 0.63 o | -6.80 o | 0.61 o | -13.28 o | 0.13 o | 33.22 o | 2.33 o | 34.35 o | 1.93 o | 23.94 o | 0.63 o | -10.95 o | 1.52 o | -11.90 o | 2.31 o | -11.26 o | 0.86 o |
| **ISW** | 12.92 o | 0.83 o | 14.22 o | 0.73 o | 9.03 o | 0.21 o | 57.75 o | 0.63 o | 58.76 o | 0.75 o | 52.41 o | 0.18 o | -5.36 o | 0.70 o | -5.40 o | 1.41 o | -7.61 o | 0.65 o |
| **MSW** | 23.96 o | 0.17 o | 24.43 o | 0.18 o | 24.41 o | 0.13 o | 31.50 o | 2.07 o | 30.93 o | 2.76 o | 34.31 o | 0.22 o | 0.70 o | 0.14 o | -0.11 o | 0.49 o | 7.19 o | 0.25 o |
| **LSW** | 27.75 o | 0.27 o | 28.05 o | 0.24 o | 28.37 o | 0.13 o | 7.05 o | 0.54 o | 7.14 o | 0.31 o | 4.53 o | 0.31 o | -5.52 o | 0.12 o | -6.22 o | 0.23 o | 2.77 o | 0.20 o |

3D-WCRS: three dimensional gait analysis of hip, knee and ankle joints, HS: heel strike; FF: foot flat; MS: midstance; HO: heel off; TO: toe off; ISW: initial swing; MSW: mid swing; LSW: late swing

a: positive values (+) and negative values (-) were hip flexion hip extension and extension, respectively

b: positive values (+) and negative values (-) were knee flexion and knee extension, respectively

c: positive values (+) and negative values (-) were ankle dorsiflexion and ankle plantarflexion, respectively

**Table S5: Means and standard errors of measurement (SEM) obtained by 3D-WCRS and ViconTM** of one gait cycle in frontal plane (n = 20)

| **phases** | **hip jointa** | | | | | | **knee jointb** | | | | | | **ankle jointc** | | | | | |
| --- | --- | --- | --- | --- | --- | --- | --- | --- | --- | --- | --- | --- | --- | --- | --- | --- | --- | --- |
| **3D-WCRS** | | | | **standard system** | | **3D-WCRS** | | | | **standard system** | | **3D-WCRS** | | | | **standard system** | |
| **1st session** | | **2nd session** | | **1st session** | | **2nd session** | | **1st session** | | **2nd session** | |
| **mean** | **SEM** | **mean** | **SEM** | **mean** | **SEM** | **mean** | **SEM** | **mean** | **SEM** | **mean** | **SEM** | **mean** | **SEM** | **mean** | **SEM** | **mean** | **SEM** |
| **HS** | 3.30 o | 0.74 o | 3.57 o | 0.64 o | 0.76 o | 0.15 o | -1.84 o | 0.37 o | -2.12 o | 0.96 o | -2.00 o | 0.04 o | 1.89 o | 2.03 o | 2.71 o | 1.90 o | 0.23 o | 0.04 o |
| **FF** | 2.77 o | 0.93 o | 2.91 o | 1.19 o | 5.50 o | 0.20 o | 0.08 o | 0.29 o | -0.22 o | 0.72 o | -0.11 o | 0.07 o | -0.24 o | 0.76 o | -1.50 o | 0.88 o | 2.96 o | 0.05 o |
| **MS** | 3.04 o | 0.61 o | 3.38 o | 0.56 o | 4.88 o | 0.05 o | 0.52 o | 0.08 o | 0.32 o | 0.23 o | -1.56 o | 0.03 o | 2.14 o | 0.75 o | 1.08 o | 0.72 o | 2.06 o | 0.05 o |
| **HO** | 2.96 o | 0.28 o | 3.13 o | 0.25 o | 2.77 o | 0.05 o | 0.06 o | 0.45 o | -0.11 o | 1.37 o | -1.47 o | 0.03 o | 0.00 o | 0.39 o | -0.36 o | 0.38 o | 0.82 o | 0.04 o |
| **TO** | -1.76 o | 1.10 o | -1.63 o | 0.98 o | -3.87 o | 0.21 o | 5.29 o | 1.29 o | 5.59 o | 3.16 o | 6.32 o | 0.28 o | -2.83 o | 1.42 o | -3.27 o | 1.28 o | 1.19 o | 0.07 o |
| **ISW** | -1.81 o | 1.42 o | -1.77 o | 1.50 o | -5.48 o | 0.06 o | 7.78 o | 0.36 o | 7.40 o | 0.67 o | 20.31 o | 0.14 o | 10.26 o | 0.58 o | 9.45 o | 0.60 o | 5.43 o | 0.04 o |
| **MSW** | 1.32 o | 0.59 o | 1.13 o | 0.28 o | -0.01 o | 0.07 o | -0.49 o | 1.33 o | -2.68 o | 5.60 o | 16.56 o | 0.15 o | 10.95 o | 0.48 o | 11.21 o | 0.83 o | 6.01 o | 0.05 o |
| **LSW** | 2.87 o | 0.44 o | 2.71 o | 0.35 o | 0.71 o | 0.07 o | -3.17 o | 0.65 o | -3.21 o | 1.77 o | -1.78 o | 0.06 o | 6.07 o | 1.06 o | 5.59 o | 0.87 o | 0.63 o | 0.05 o |

3D-WCRS: three dimensional gait analysis of hip, knee and ankle joints, HS: heel strike; FF: foot flat; MS: midstance; HO: heel off; TO: toe off; ISW: initial swing; MSW: mid swing; LSW: late swing

a: positive values (+) and negative values (-) were hip adduction and hip abduction

b: positive values (+) and negative values (-) were knee adduction and knee abduction

c: positive values (+) and negative values (-) were ankle inversion and ankle eversion

**Table S6:** **Means and standard errors of measurement (SEM) obtained by 3D-WCRS and ViconTM of one gait cycle in horizontal plane (n = 20)**

| **phases** | **hip jointa** | | | | | | **knee jointb** | | | | | | **ankle jointc** | | | | | |
| --- | --- | --- | --- | --- | --- | --- | --- | --- | --- | --- | --- | --- | --- | --- | --- | --- | --- | --- |
| **3D-WCRS** | | | | **standard system** | | **3D-WCRS** | | | | **standard system** | | **3D-WCRS** | | | | **standard system** | |
| **1st session** | | **2nd session** | | **1st session** | | **2nd session** | | **1st session** | | **2nd session** | |
| **mean** | **SEM** | **mean** | **SEM** | **mean** | **SEM** | **mean** | **SEM** | **mean** | **SEM** | **mean** | **SEM** | **mean** | **SEM** | **mean** | **SEM** | **mean** | **SEM** |
| **HS** | -2.93 o | 1.01 o | -2.86 o | 1.48 o | -6.49 o | 0.25 o | 4.19 o | 1.29 o | 5.16 o | 1.03 o | -4.67 o | 0.17 o | 3.74 o | 0.54 o | 2.86 o | 0.33 o | -2.70 o | 0.16 o |
| **FF** | 7.54 o | 1.45 o | 8.50 o | 1.15 o | 8.21 o | 0.26 o | 4.79 o | 2.99 o | 2.93 o | 1.98 o | -4.40 o | 0.15 o | 1.75 o | 0.30 o | 1.33 o | 0.30 o | -14.68 o | 0.22 o |
| **MS** | 3.19 o | 0.49 o | 3.87 o | 0.44 o | 8.23 o | 0.17 o | 3.92 o | 1.16 o | 1.53 o | 0.89 o | -6.31 o | 0.15 o | 0.94 o | 0.30 o | 0.19 o | 0.26 o | -10.85 o | 0.19 o |
| **HO** | -2.07 o | 0.36 o | -1.88 o | 0.24 o | 3.44 o | 0.10 o | 8.03 o | 0.67 o | 6.47 o | 0.43 o | -3.86 o | 0.12 o | -0.91 o | 0.33 o | -1.81 o | 0.34 o | -5.27 o | 0.20 o |
| **TO** | -2.61 o | 0.43 o | -2.34 o | 0.50 o | 9.94 o | 0.20 o | 3.45 o | 0.82 o | 2.55 o | 0.83 o | -7.43 o | 0.14 o | -0.19 o | 3.10 o | -0.27 o | 1.91 o | -6.90 o | 0.45 o |
| **ISW** | -0.57 o | 0.35 o | -1.13 o | 0.20 o | 19.30 o | 0.15 o | 4.10 o | 0.55 o | 4.64 o | 1.38 o | -3.79 o | 0.17 o | -15.92 o | 1.17 o | -15.40 o | 1.17 o | -24.57 o | 0.15 o |
| **MSW** | 6.55 o | 0.53 o | 7.02 o | 0.61 o | 21.70 o | 0.11 o | -13.24 o | 1.48 o | -15.12 o | 1.14 o | -10.10 o | 0.16 o | -11.22 o | 0.53 o | -11.23 o | 0.72 o | -26.58 o | 0.14 o |
| **LSW** | -5.10 o | 0.91 o | -7.23 o | 0.92 o | -5.24 o | 0.30 o | -0.45 o | 1.17 o | 1.84 o | 0.90 o | -5.09 o | 0.18 o | -1.95 o | 0.24 o | -1.79 o | 0.35 o | -3.17 o | 0.23 o |

3D-WCRS: three dimensional gait analysis of hip, knee and ankle joints, HS: heel strike; FF: foot flat; MS: midstance; HO: heel off; TO: toe off; ISW: initial swing; MSW: mid swing; LSW: late swing

a: positive values (+) and negative values (-) were hip internal rotation and hip external rotation

b: positive values (+) and negative values (-) were knee internal rotation and knee external rotation

c: positive values (+) and negative values (-) were ankle internal rotation and ankle external rotation
